# Supplementary material for: A high-conduction Ge substituted Li3AsS4 solid electrolyte with exceptional low activation energy
Source: Royal Society of Chemistry journal article supplement (doi:10.1039/c4ta01243g), 2014-01-01
Supplement: c4ta01243g1.pdf [file c4ta01243g1.pdf]

## Supporting Information

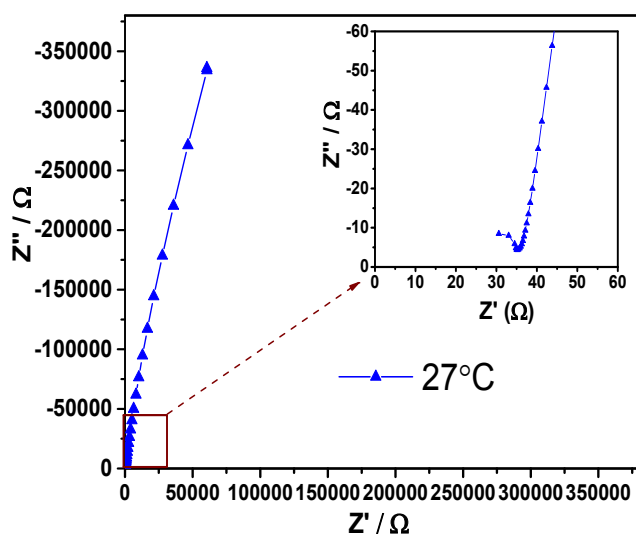

**Fig. S1.** AC impedance spectrum of  $\text{Li}_{3.334}\text{Ge}_{0.334}\text{As}_{0.666}\text{S}_4$  measured at room temperature. The total conductivity is determined by using the intercept between the semi-arc and straight line as the total resistance.

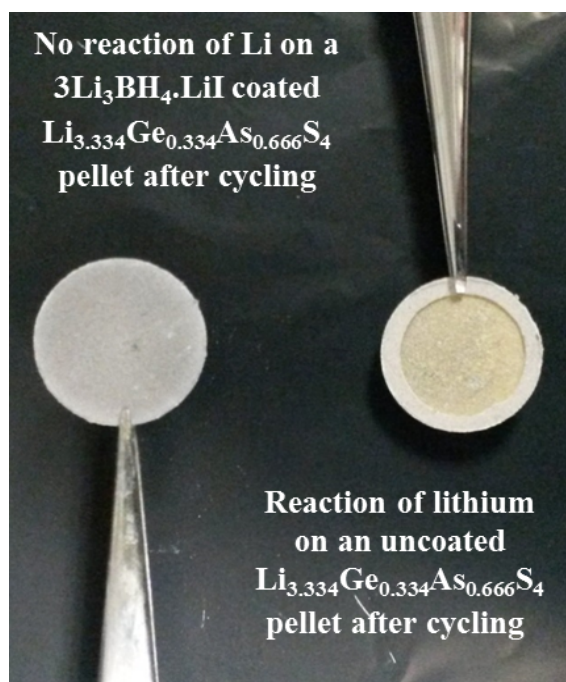

**Fig. S2.** Post-mortem analysis of cycled  $\text{Li}_{3.334}\text{Ge}_{0.334}\text{As}_{0.666}\text{S}_4$  pellet with and without  $3\text{Li}_3\text{BH}_4\cdot\text{LiI}$  coating. The chemical reaction of lithium with the solid electrolyte is clearly visible on an uncoated pellet as opposed to the surface passivated pellet where the coating protects the solid electrolyte from reacting with lithium metal.
